# Supplementary material for: Tree shrew, a potential animal model for hepatitis C, supports the infection and replication of HCV in vitro and in vivo
Source: PubMed Central journal article supplement (PMC5656785; doi:10.1099/jgv.0.000869), 2017-07-31
Supplement: jgv-98-2069-s001.pdf [file jgv-98-2069-s001.pdf]

Table S1: Evolution of ALT levels in infected Tupaia with HCV during 24 weeks

| Weeks | ATL value (U) of the infection samples |     |    |    |     |    |    |    |     |     |     |     |     |     |     |     |     |     |     |     |     |     |     |     |     |     |     |     |     |     |
|-------|----------------------------------------|-----|----|----|-----|----|----|----|-----|-----|-----|-----|-----|-----|-----|-----|-----|-----|-----|-----|-----|-----|-----|-----|-----|-----|-----|-----|-----|-----|
|       | T1                                     | T2  | T3 | T4 | T5  | T6 | T7 | T8 | T9  | T10 | T11 | T12 | T13 | T14 | T15 | T16 | T17 | T18 | T19 | T20 | T21 | T22 | T23 | T24 | T25 | T26 | T27 | T28 | T29 | T30 |
| 1     | 27                                     | 76  | 91 | 78 | 102 | 81 | 80 | 56 | 138 | 46  | 38  | 28  | 85  | 69  | 84  | 57  | 56  | 57  | 64  | 57  | 56  | 30  | 79  | 58  | 33  | 33  | 41  | 56  | 46  | 48  |
| 2     | 47                                     | 19  | 88 | 75 | 47  | 43 | 79 | 38 | 67  | 42  | 29  | 34  | 76  | 39  | 84  | 34  | 38  | 34  | 57  | 55  | 35  | 55  | 66  | 26  | 32  | 32  | 29  | 29  | 75  | 32  |
| 3     | 20                                     | 42  | 64 | 60 | 32  | 32 | 69 | 29 | 29  | 49  | 15  | 9   | 66  | 46  | 76  | 52  | 29  | 36  | 76  | 32  | 37  | 41  | 62  | 30  | 96  | 96  | 32  | 32  | 49  | 40  |
| 4     | 91                                     | 89  | 62 | 52 | 31  | 18 | 59 | 27 | 80  | 49  | 57  | 22  | 63  | 57  | 57  | 25  | 27  | 39  | 66  | 32  | 50  | 45  | 58  | 45  | 46  | 46  | 57  | 54  | 64  | 37  |
| 6     | 43                                     | 104 | 54 | 49 | 20  | 22 | 57 | 25 | 17  | 32  | 32  | 33  | 62  | 40  | 50  | 31  | 25  | 34  | 82  | 29  | 40  | 36  | 45  | 46  | 56  | 56  | 36  | 45  | 57  | 47  |
| 8     | 67                                     | 146 | 44 | 48 | 46  | 25 | 44 | 22 | 10  | 55  | 46  | 40  | 57  | 61  | 40  | 34  | 22  | 32  | 73  | 26  | 60  | 62  | 40  | 60  | 42  | 42  | 47  | 42  | 57  | 53  |
| 10    | 40                                     | 142 | 40 | 42 | 63  | 23 | 34 | 20 | 5   | 75  | 43  | 48  | 43  | 32  | 31  | 48  | 20  | 37  | 81  | 87  | 33  | 47  | 26  | 29  | 51  | 51  | 42  | 37  | 76  | 27  |
| 12    | 49                                     | 13  | 32 | 42 | 23  | 69 | 31 | 17 | 1   | 28  | 50  | 21  | 41  | 27  | 25  | 32  | 17  | 34  | 72  | 74  | 42  | 42  | 25  | 27  | 49  | 49  | 19  | 38  | 66  | 42  |
| 16    | 34                                     | 13  | 31 | 35 | 23  | 69 | 18 | 12 | 1   | 67  | 22  | 21  | 36  | 44  | 25  | 27  | 12  | 11  | 63  | 54  | 29  | 23  | 17  | 31  | 82  | 62  | 39  | 27  | 63  | 33  |
| 20    | 43                                     | 92  | 30 | 32 | 43  | 85 | 18 | 34 | 66  | 43  | 30  | 36  | 31  | 52  | 14  | 29  | 34  | 40  | 28  | 31  | 37  | 59  | 94  | 48  | 49  | 82  | 38  | 43  | 82  | 28  |
| 24    | 61                                     | 104 | 65 | 64 | 20  | 22 | 36 | 29 | 17  | 54  | 43  | 49  | 34  | 32  | 31  | 30  | 49  | 23  | 46  | 30  | 35  | 36  | 58  | 49  | 62  | 55  | 29  | 40  | 73  | 40  |

The data of 14 animals with HCV viremia were marked in blue.

**Table S2: Evolution of ALT levels in uninfected *Tupaia* during 24 weeks**

| Weeks | ALT value (U) of the noninfection samples |    |    |    |    |    |    |    |    |     |
|-------|-------------------------------------------|----|----|----|----|----|----|----|----|-----|
|       | C1                                        | C2 | C3 | C4 | C5 | C6 | C7 | C8 | C9 | C10 |
| 1     | 63                                        | 36 | 43 | 85 | 18 | 46 | 38 | 71 | 56 | 38  |
| 2     | 21                                        | 34 | 31 | 76 | 30 | 42 | 29 | 63 | 20 | 29  |
| 3     | 32                                        | 35 | 52 | 66 | 40 | 49 | 15 | 56 | 37 | 15  |
| 4     | 51                                        | 33 | 41 | 63 | 71 | 49 | 57 | 48 | 31 | 57  |
| 6     | 8                                         | 2  | 6  | 62 | 22 | 32 | 32 | 44 | 27 | 32  |
| 8     | 19                                        | 19 | 43 | 57 | 19 | 55 | 46 | 33 | 34 | 46  |
| 10    | 2                                         | 5  | 64 | 43 | 21 | 67 | 18 | 24 | 56 | 43  |
| 12    | 10                                        | 5  | 19 | 41 | 13 | 43 | 17 | 23 | 56 | 18  |
| 16    | 10                                        | 5  | 19 | 36 | 16 | 54 | 20 | 5  | 51 | 17  |
| 20    | 72                                        | 28 | 42 | 31 | 66 | 62 | 21 | 43 | 82 | 20  |
| 24    | 8                                         | 2  | 6  | 24 | 44 | 53 | 13 | 57 | 33 | 21  |

Table S3. PCR primers and amplification conditions

| Gene    | Primer name | Position* | PCR Products<br>Size (bp) | HCV primer sequence               | Amplification conditions                                                        |
|---------|-------------|-----------|---------------------------|-----------------------------------|---------------------------------------------------------------------------------|
| 5'NCR   | 5UTRF01     | 37-62     | 359                       | 5-CACTCCCCTGTGAGGAACTACTGTCT-3    | 50°C 30min, 95°C 3 min, 95°C 30 sec 50°C 30 sec 72°C 0:50 min (34x), 72°C 5 min |
|         | 5UTRR01     | 430-454   |                           | 5-CGGCAACAAGTATACTCCGCCAACG-3     |                                                                                 |
|         | 5UTRF02     | 64-85     |                           | 5-CACGCAGAAAGCGCCTAGCCAT-3        |                                                                                 |
|         | 5UTRR02     | 400-422   |                           | 5-CGCCGCCCGGGAACCTTAACGTCT-3      |                                                                                 |
| E2      | E2F01       | 1209-1232 | 688                       | 5-TGTTCAATTGTCTCGCCGCAGCACC-3     | 50°C 30min, 95°C 3 min, 95°C 30 sec 55°C 30 sec 72°C 1:40 min (34x), 72°C 5 min |
|         | E2R01       | 1997-2022 |                           | 5-CCAGAAGAGTTCATCCACGTGCAGCC-3    |                                                                                 |
|         | E2F02       | 1293-1319 |                           | 5-TGGCATGGGACATGATGATGAACTGGT-3   |                                                                                 |
|         | E2R02       | 1952-1980 |                           | 5-GGTGGTCGAGTGCTGTTCAATAGGAAGAC-3 |                                                                                 |
| NS5B-F1 | F1NS5BF01   | 7551-7578 | 1069                      | 5-TGGAGTCTGATCAGGTAGAGCTTCAACC-3  | 50°C 30min, 95°C 3 min, 95°C 30 sec 50°C 30 sec 72°C 2:30 min (34x), 72°C 5 min |
|         | F1NS5BR01   | 8696-8722 |                           | 5-ATCACCAGGAGGGGCAGAGTACCTGGT-3   |                                                                                 |
|         | F1NS5BF02   | 7620-7646 |                           | 5-GGTCTTGGTCTACTTGCTCCGAGGAGG-3   |                                                                                 |
|         | F1NS5BR02   | 8665-8688 |                           | 5-TCCGTGAAGGCTCTCAGGTTCCGC-3      |                                                                                 |
| NS5B-F2 | F2NS5BF01   | 8515-8539 | 895                       | 5-GGTGCTAACCCTAGCATGGGTAAC-3      | 50°C 30min, 95°C 3 min, 95°C 30 sec 52°C 30 sec 72°C 2:30 min (34x), 72°C 5 min |
|         | F2NS5BR01   | 9454-9481 |                           | 5-GAACAGTTAGCTATGGAGTGACCTAG-3    |                                                                                 |
|         | F2NS5BF02   | 8565-8592 |                           | 5-TAGCGGCCTGCAAGGCTGCGGGGATAGT-3  |                                                                                 |
|         | F2NS5BR02   | 9433-9459 |                           | 5-ACCTAGTGTGTGCCGCTCTACCGAGCG-3   |                                                                                 |

\*Nucleotide positions are numbered as for AB047639.
